# Supplementary material for: Biosynthetic Gene Cluster for the Cladoniamides, Bis-Indoles with a Rearranged Scaffold
Source: PubMed Central journal article supplement (PMC3158105; doi:10.1371/journal.pone.0023694), 2011-08-18
Supplement: pone.0023694.s001.pdf [file pone.0023694.s001.pdf]

```

staC-1      ATGACGCATTCGGGTGAGCGGACCGATGTGCTGATCGTGGGCGGCGGCCCGGTGCGGATG 60
staC-2      ATGACGCATTCGGGTGAGCGGACCGATGTGCTGATCGTGGGCGGCGGCCCGGTGCGGATG 60
staC-3      ATGACAAACTCCGGCGAGTGGACCGACGTGCTGATCGTGGGCGGCGGCCCGGTGCGGATG 60
inkE       ATGAC---TCGCAGCGAAGAGACCGACGTCTCATCGTGGGCGGCGGCCCGGTGCGGCTG 57
rebC       ATGACGCGCCCATCGA---AACAGACGTGCTGATCCTGGGCGGAGGTCCGGTGGGCATG 57
atC        ATGACCACGGCTTACGA---GACCGACGTCTGGTTCATCGGCGGCGGCCCGGTGCGCATG 57
          ****                **  ** * * * * *  * * * * * * * * * * * *

staC-1      GCGCTGGCGCTGGATCTGAGGTACCGGGGAATCGACTGTCTGGTCTGACGCGCGGTGAC 120
staC-2      GCGCTGGCGCTGGATCTGAGGTACCGGGGAATCGACTGTCTGGTCTGACGCGCGGTGAC 120
staC-3      GCGTTGGCACTGGACCTGAGGTACCGGGGAATCGACTGCATGGTTGTCGAAGCGGGCGAC 120
inkE       GGCCTGTCACTGGACCTACCCATCGCGCGCTCCGGCACATCGTGTGACGCGGGCGAC 117
rebC       GCGCTGGCGCTGACCTGCCCATCGCCAGGTGGCCACCTCGTGTGAGGAGACCGAC 117
atC        GCGCTGGTGTGGACCTGAAGTACCGGGGAGTCGGCTGCCAGTCAATCGAGGCGAGCGAC 117
          **  * *  * * * * *  * * *  * * * *  * * * *  * * * *  * * * *

staC-1      GGCACGGTCCGGCACCCCAAGGTGAGCACCATCGGTCGCCGCTCGATGGAACTCTTCCGC 180
staC-2      GGCACGGTCCGGCACCCCAAGGTGAGCACCATCGGTCGCCGCTCGATGGAACTCTTCCGC 180
staC-3      GGCAGGTCCGGCACCCCAAGGTGAGTACGATCGGTCGCCGCTCGATGGAACTGTGTTCCG 180
inkE       GCGTGGTGGCGCCACCGAAGGTGAGCAGCGTGGGCGCGGCTCGATGGAACTGTGTTCCG 177
rebC       GGTACGATCACCCACCGCGGGTGGCACCATCGGTCGCCGCTCGATGGAACTCTTCCGC 177
atC        GGCTCGGTCTCGCATCCGCGGGTGGGCTCGATCGGTCGCCGCTCGATGGAACTGTGTTCCG 177
          **  * *  * * * *  * * *  * * * * * * * * * * * * * * * *

staC-1      CGCTGGGGCACCGC-GGACGCCATCCGGAACGCCGGCTGGCCCGCCGACCATCCCTGGA 239
staC-2      CGCTGGGGCGCCGC-GGACGCCATCCGGAACGCCGGCTGGCCCGCCGACCATCCCTGGA 239
staC-3      CGTTGGGGTCTCGC-GGACACCATCCGTAACGCGGGATGGCCCGCCGACCATCCCTGGA 239
inkE       CGCTGGGGGTGGCCGGCGC-GGTGAGGACGCGGGCTGGCCCGCCGCTCACCCGCTCGA 236
rebC       CGCTGGGGTGTGCGAAGCA-GATCCGCACCGCGGGTGGCCCGCCGACCATCCGCTCGA 236
atC        AAGTGGGGGATCGCCGACC-GATCCGTCGCCGGCTGGCCCGCCGACCATCCGCTCGA 236
          *  * * * * *  * *  * * * *  * * * * * * * * * * * * * * *

staC-1      CATCGCTGGGTGACCAAGGTGCGCGGCCACGAGATCTACCGCTACCGCGGGGACGCGC 299
staC-2      CATCGCTGGGTGACCAAGGTGCGCGGCCACGAGATCTACCGCTACCGCGGAGGACGCGC 299
staC-3      CATCGCTGGGTGACCAAGGTGCGCGGCCACGAGGTGACCGGTATCGCGGGGACGCGC 299
inkE       CATCGCGTGGGTGACCCGCGTCCGCGGAGTACGAGATCCACCGGTTCGAGCGCGGACCGC 296
rebC       CGCCGCGTGGGTGACGAGGTTGGCGGCCACGAGGTGTACAGAATCCCGCTCGGCACCGC 296
atC        CACCGCTGGGTGACTCAGGTGGGCGGGCACGAGATCCACCGGTTCGCGGTGGGCACCGC 296
          *  * * * * * * *  * * * *  * * * * * * *  * * * * * * *

staC-1      CGCGAACC GCCCGCCCTTCGTCCATACCCCGAGCCGATCAGATCTGCCCGCCACTG 359
staC-2      CGCGAACC GCCCGCCCTTCGTCCATACCCCGAGCCGATCAGATCTGCCCGCCACTG 359
staC-3      GGCGAACC GTCGGCCCTACGTACACCCCTGAGCCGACAGATCTGTCCGGGCGACTG 359
inkE       GCGCGCCCGCCCGGTGTTCGCGCACACGCGGAGCCGGACCAGGTGTGCCCGCCACTG 356
rebC       GGACACCAGGGCGACACCCGAGCACACACCAGAACCAGCGGATCTGCCCGCAGCACTG 356
atC        CGACACCAGGGCGCTGCCCGGTACACGCGGAACCGGAACAGGTCTGCCCGCAGCACTG 356
          *  * * *  *  * * * * * * * * * * * * * * * * * * * *

staC-1      GCTCAACCCGGTGTG-ATCGAGGCGTGGGCGTCCACCCGACGGCCCTGCG-ACTG 417
staC-2      GCTCAACCCGGTGTG-ATCGAGGCGTGGGCGTCCACCCGACGGCCCTGCT-ACTG 417
staC-3      GCTGAATCCACTGTTGCAACG-GGCCGTGCGGTGCACCCACCGGTCCACTGCG-GCTC 417
inkE       GCTGAACCCGGTGTG---GCGGGCG-CGGTGGGCA---GGCCGTCGCTAC---CT- 404
rebC       GCTCGCACCCCTGCTG-GCGGAGG---CCGT-----CGGCGAGAGGTGCGCACCC 403
atC        GCTGGCGCCCTGCTG-CTGGAGGAGCCCGCACCCACCCCGCGGGTCTGTCGCGCACCC 415
          ***  * *  * * * *  * * *  *  * *  * *  * *  * *  * *

staC-1      AGCACGACCGTCGACGGCGTGGTCCAGACCGACACCGTTCGAGGCCAC--CCTCACCG 475
staC-2      AGTACGACCGTCGACGGCGTGGTCCAGACCGACACCGTTCGAGGCCAC--CCTCACCG 475
staC-3      AGGACGACCGTGGACCGGTGCGTCAAGCGGGCGGACCATGTTCGAGGCCAC--CCTCGTCG 475
inkE       -GCACCGCC-TGGAGCACTTCGAGCAGGACGCGGTTGCGTGGGGCCACGATCTCCTCG 462
rebC       GCTCGCGGC-TGGACTCCTTCGAGCAGCGGACCGACCGTTCGCGGCCACG--ATCACCG 460
atC        GGTGCCGAC-TCGACGGTTCACCCAGCAGCAGCACCGTTCGAGGCCGACG--GTCACCG 472
          *  * * *  * *  * * * *  * *  * *  * *  * *  * *

```

*staC-1* ACC--ACGCCACCGGCACCACCGGCACCGTCCGGGCACGCTTCCTGGTCGCCTGTGACGG 533  
*staC-2* ACC--ACGCCACCGGCACCACCGGCACCGTCCGGGCACGCTTCCTCGTCGCCTGTGACGG 533  
*staC-3* AGG--ACGGTTCCGGAAGGACCGGCACCGTCCGCACACAATTCCTGGTTGCCTGCGACGG 533  
*inkE* A----ACGGC-----GAGGAATCGGT--CGTCTGGGCGCGCTATCTGGTGGCCTGCGACGG 512  
*rebC* ACCT--CCGCACGGGTGCCACCCGTGCCGTGCACGCCAGGTATCTGGTGGCGTGTGACGG 518  
*atC* ACCTGGCCG-AGGGGCGCGAGCTCCGG-ATCCGCGCCCGCTACATGGTGGCGGTGGACGG 530  
\* \* \* \* \* \* \* \* \* \* \* \* \* \* \*

*staC-1* CGCCTCCTCGCCCATCCGCCGGGCCTGCGGCATCGAGGCACCGGCCCGCCAC-CGTACG- 591  
*staC-2* CGCCTCCTCGCCCGTCCGCCGGGCCTGCGGCATCGAGGCACCGGCCCGCCAC-CGTACG- 591  
*staC-3* GGCTGCCTACCCATTCCGGCAGGCCTGCGGCATCGACGCACCGCCACGCCAC-ACGACG- 591  
*inkE* CAGCTCCTCCGTCGTCGCAAGGCCCTCGGCATCGACTCGCCC GCCCGCCAC-GAGGCG- 570  
*rebC* CGCCTCCTCCCCACCGCAAGGCCCTGCGGCATCGACGCACCGAGGCAC-AGGACG- 576  
*atC* CGCGTCCTCCTCCGGTGCAGGCCCTGCGGCATC---CCGTCTGGCTCGCTACGACGT 587  
\*\*\*\*\* \*\* \*\*\*\*\* \* \* \* \* \* \*\*

*staC-1* CA-GGTC**TCCGCAACATCCTCTCCGCGC**CCCCGAACT---CAAGGACC-----GCCT 641  
*staC-2* CA-GGTC**TCCGCAACATCCTCTCCGCGC**CCCCGAGCT---CAAGGACC-----GCCT 641  
*staC-3* CA-GGTC**TTCGGAACATCCTCTCCGTGC**CCCCGAACT---CAAGCGGC-----AACT 641  
*inkE* CA-GGTC**TCCGCAACGTGCTCTCCGCGC**GCCGGGGCTGCCCGCGCGCCTCGCGGAGCG 629  
*rebC* CA-GGTC**TCCGCAACATCCTGTCCGCGC**CCCCGAACTG--CGTTCGCT-----CCT 626  
*atC* CATGACC**TCCGCAACATCCTCTCCGTGC**GCCCGAGCTG--CGTGC GC- - - - -GCT 638  
\*\* \* \*\* \* \* \* \* \* \* \* \* \* \* \* \* \* \* \* \*
